# Supplementary material for: A 2D free-standing film-inspired electrocatalyst for highly efficient hydrogen production
Source: Royal Society of Chemistry journal article supplement (doi:10.1039/c7ta03228e), 2017-01-01
Supplement: c7ta03228e1.pdf [file c7ta03228e1.pdf]

## 2D Free-standing Film-Inspired Electrocatalyst for Highly Efficient Hydrogen Production

Jian Gao, Zihua Cheng, Changxiang Shao, Yang Zhao\*, Zhipan Zhang and Liangti Qu\*

Key Laboratory of Photoelectronic/Electrophoto Conversion Materials, School of Chemistry, Beijing Institute of Technology, Beijing 100081, P. R. China

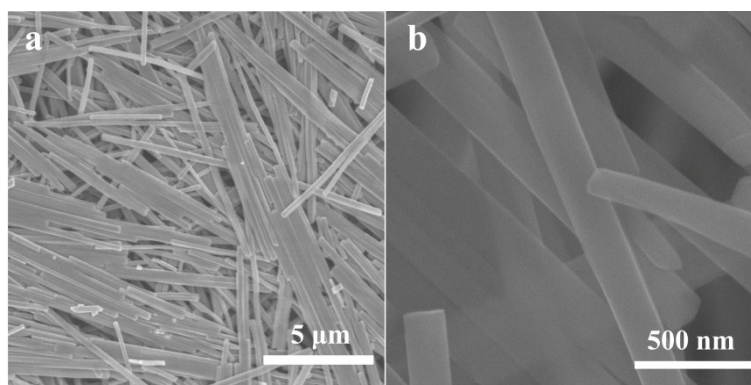

**Figure S1** (a, b) The SEM images of the as-prepared molybdenum trioxide ( $\text{MoO}_3$ ) nanoribbons.

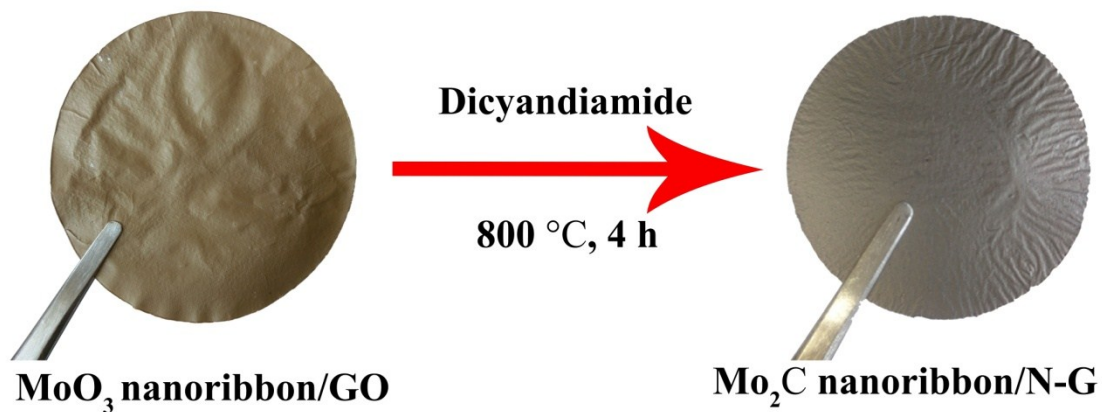

**Figure S2** The photograph of the self-standing film prepared via a conversion from the MoO<sub>3</sub> nanoribbon/GO film (claybank color) and Mo<sub>2</sub>C nanoribbon/N-G film (shiny metallic luster).

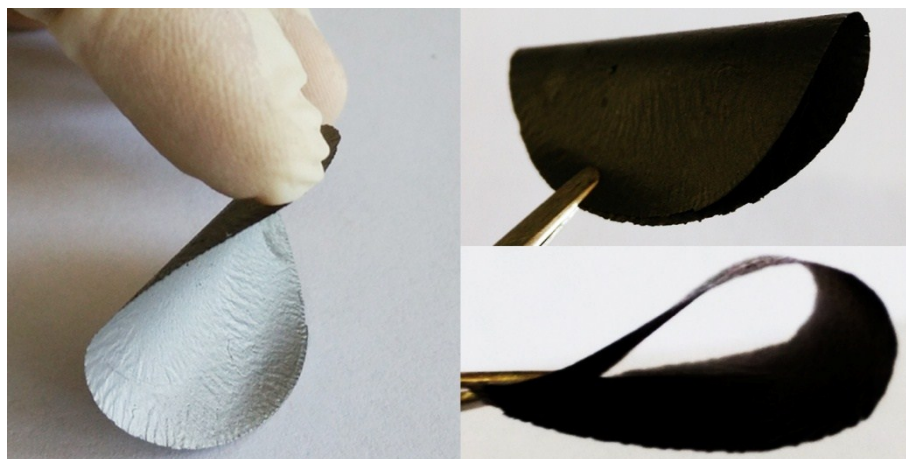

**Figure S3** photographs of the free-standing Mo<sub>2</sub>C nanoribbon/N-G film.

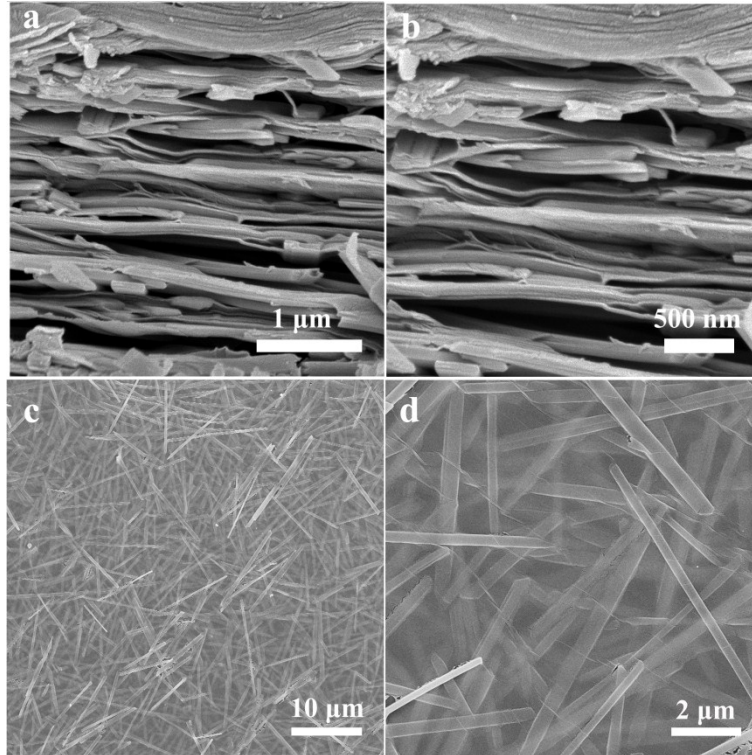

**Figure S4** The SEM images of the cross-section (a, b) and top surface (c, d) of MoO<sub>3</sub> nanoribbon/GO film.

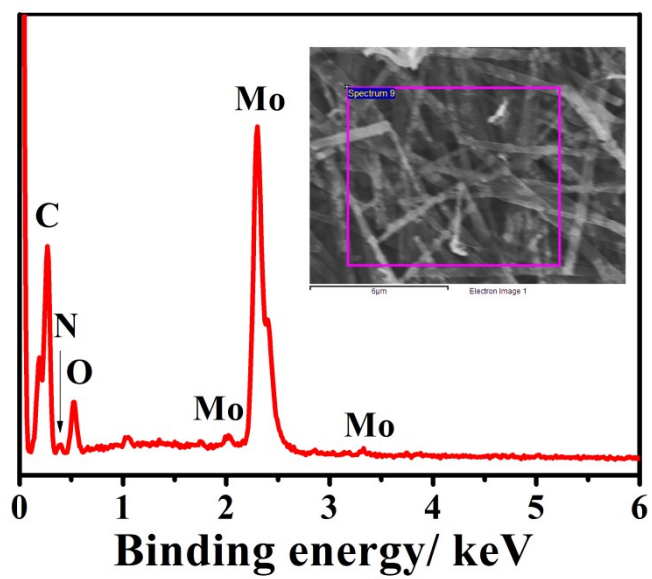

**Figure S5** EDS spectrum of the Mo<sub>2</sub>C nanoribbon/N-G film.

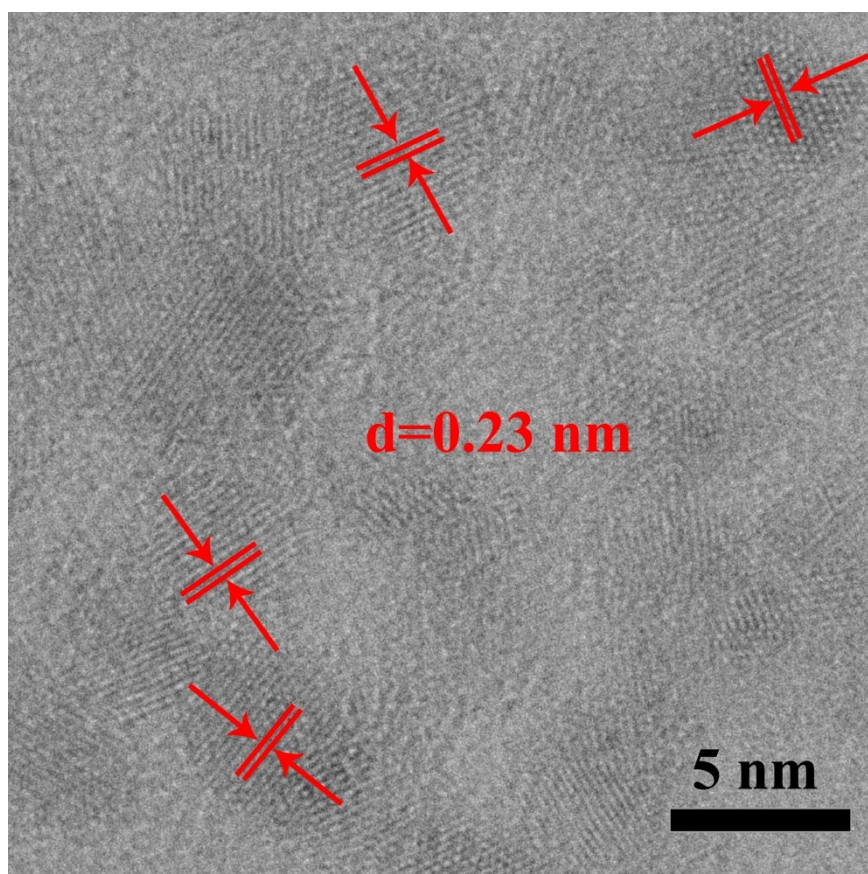

**Figure S6** HR-TEM image of the Mo<sub>2</sub>C nanocrystals on the surface of Mo<sub>2</sub>C nanoribbon/N-G film.

**Table S1** Elemental contents of Mo<sub>2</sub>C nanoribbon/N-G film.

| Samples                                     | Mo/XPS<br>(wt%) | C/XPS<br>(wt%) | N/XPS<br>(wt%) | O/XPS<br>(wt%) |
|---------------------------------------------|-----------------|----------------|----------------|----------------|
| Mo <sub>2</sub> C<br>nanoribbon/N-G<br>film | 1.07            | 84.95          | 8.54           | 5.44           |

**Table S2.** Summary of representative non-noble metal based free-standing HER catalysts in acidic electrolyte.

| Non-noble metal based free-standing catalysts                                     | Onset overpotential<br>mV | Current density<br>mA cm <sup>-2</sup> | Overpotential<br>mV | Ref.             |
|-----------------------------------------------------------------------------------|---------------------------|----------------------------------------|---------------------|------------------|
| NiSe <sub>2</sub> nanowall/carbon cloth                                           | 120                       | 10                                     | 145                 | 1                |
| Mo <sub>2</sub> C nanobeads on Graphene-coated carbon nanofibers (G-CNF) membrane | 115                       | 10                                     | 188                 | 2                |
| 3D graphene/MoS <sub>2</sub> composites                                           | 110                       | 50                                     | 200                 | 3                |
| Cu nanoparticles/carbon nanofibers hybrid                                         | 61                        | 10                                     | 200                 | 4                |
| Monolayer MoS <sub>2</sub> films/3D nanoporous metals                             | 118                       | 10                                     | 226                 | 5                |
| NiO@C nanobelt                                                                    | -                         | 10                                     | 294                 | 6                |
| 3D ReS <sub>2</sub> /carbon foam                                                  | -                         | 10                                     | 336                 | 7                |
| <b>Mo<sub>2</sub>C nanoribbon/N-G film</b>                                        | <b>84</b>                 | <b>10</b>                              | <b>162</b>          | <b>This work</b> |

**Table S3.** Summary of representative Mo<sub>2</sub>C-based HER catalysts in acidic electrolyte.

| Mo <sub>2</sub> C-based HER catalyst                                 | Current density              | Overpotential | Reference        |
|----------------------------------------------------------------------|------------------------------|---------------|------------------|
| MoCN                                                                 | 10 mA cm <sup>-2</sup>       | 145 mV        | 8                |
| Mo <sub>2</sub> C nanocrystal embedded N-doped carbon nanotubes      | 10 mA cm <sup>-2</sup>       | 147 mV        | 9                |
| Mo <sub>2</sub> C nano-rod Ni impregnated Mo <sub>2</sub> C nano-rod | 10 mA cm <sup>-2</sup>       | 150 mV        | 10               |
| Mo <sub>2</sub> C/CNT                                                | 10 mA cm <sup>-2</sup>       | ~150 mV       | 11               |
| Commercial Mo <sub>2</sub> C                                         | 10 mA cm <sup>-2</sup>       | 192 mV        | 12               |
| Mo <sub>2</sub> C nanoparticles                                      | 10 mA cm <sup>-2</sup>       | 198 mV        | 13               |
| Mo <sub>2</sub> C nanowires                                          | 10 mA cm <sup>-2</sup>       | 200 mV        | 14               |
| Mo <sub>2</sub> C Nanoparticles Decorated Graphitic Carbon Sheets    | 10 mA cm <sup>-2</sup>       | 210 mV        | 15               |
| Mo <sub>2</sub> C-carbon nanocomposite                               | 5 mA cm <sup>-2</sup>        | 260 mV        | 16               |
| <b>Mo<sub>2</sub>C nanoribbon/N-G film</b>                           | <b>10 mA cm<sup>-2</sup></b> | <b>162 mV</b> | <b>This work</b> |



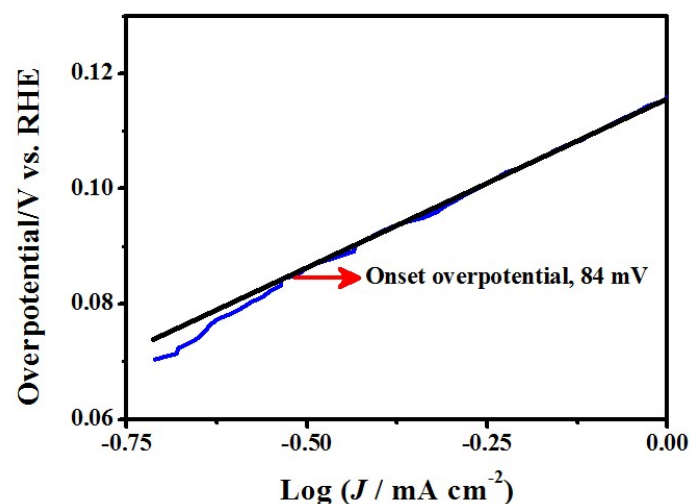

**Figure S7** The Tafel plot of the Mo<sub>2</sub>C nanoribbon/N-G film.

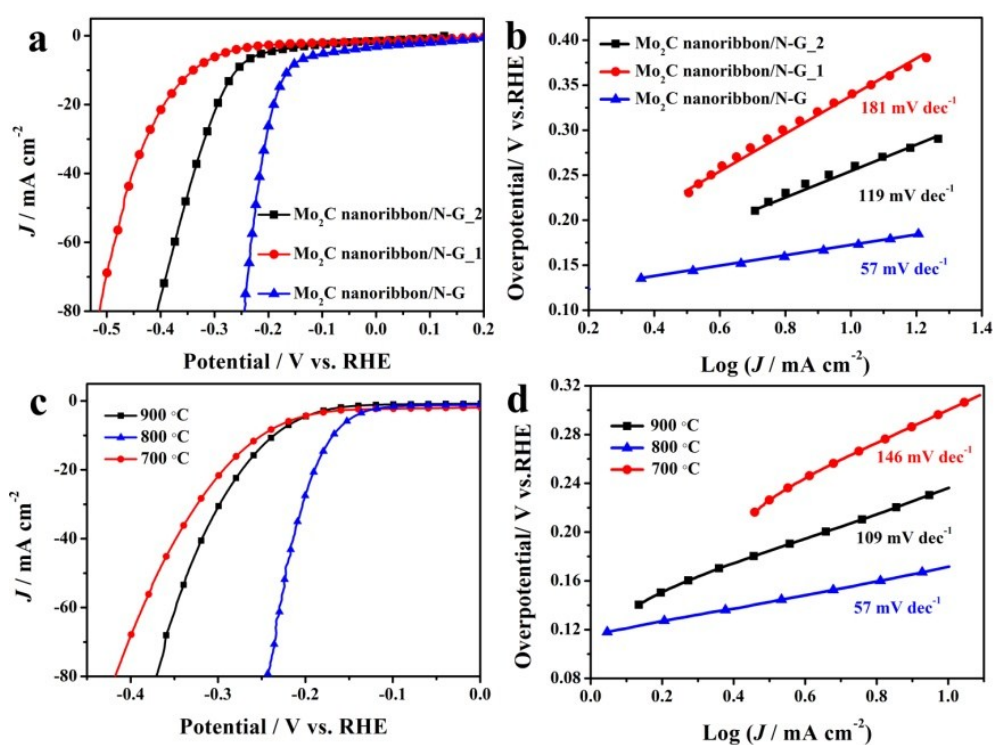

**Figure S8** (a) Polarization curves and (b) Tafel plots of Mo<sub>2</sub>C nanoribbon/N-G, Mo<sub>2</sub>C nanoribbon/N-G<sub>1</sub> and Mo<sub>2</sub>C nanoribbon/N-G<sub>2</sub> in 0.5 M H<sub>2</sub>SO<sub>4</sub>, respectively. (c) Polarization curves and (d) Tafel plots of Mo<sub>2</sub>C nanoribbon/N-G at different carbonization temperature, respectively.



The weight percentage of MoO<sub>3</sub> nanoribbon in the Mo<sub>2</sub>C nanoribbon/N-G film and calcination temperature play important role in HER properties. As shown in Figure S8a and b, the Mo<sub>2</sub>C nanoribbon/N-G films with lower or higher weight percentage of MoO<sub>3</sub> nanoribbon are investigated. The corresponding samples are labeled as Mo<sub>2</sub>C nanoribbon/N-G\_1 (the weight ratio of MoO<sub>3</sub> nanoribbon to GO is 2:1) and Mo<sub>2</sub>C nanoribbon/N-G\_2 (the weight ratio of MoO<sub>3</sub> nanoribbon to GO is 8:1), respectively. However, both of the Mo<sub>2</sub>C nanoribbon/N-G\_1 and Mo<sub>2</sub>C nanoribbon/N-G\_2 exhibits poorer HER performance than that of the as-prepared Mo<sub>2</sub>C nanoribbon/N-G (the weight percentage of MoO<sub>3</sub> nanoribbon is 5), which is probably due to the low electrocatalytic activity for the Mo<sub>2</sub>C nanoribbon/N-G\_1 and aggregation of Mo<sub>2</sub>C nanoribbons in Mo<sub>2</sub>C nanoribbon/N-G\_2.

In addition, the Mo<sub>2</sub>C nanoribbon/N-G film with different calcination temperatures (700 °C, 800 °C and 900 °C) are also studied. As demonstrated in Figure S8c and d, the Mo<sub>2</sub>C nanoribbon/N-G film shows the increasing HER performance with the increase calcination temperature from 700 °C to 800 °C, probably attributed to efficient crystalline transformation of β-Mo<sub>2</sub>C. However, when the calcination temperature reaches 900 °C, the as-prepared Mo<sub>2</sub>C nanoribbon/N-G film exhibits a slight decrease of the HER performance, probably due to the loss of N element at high treating temperature.

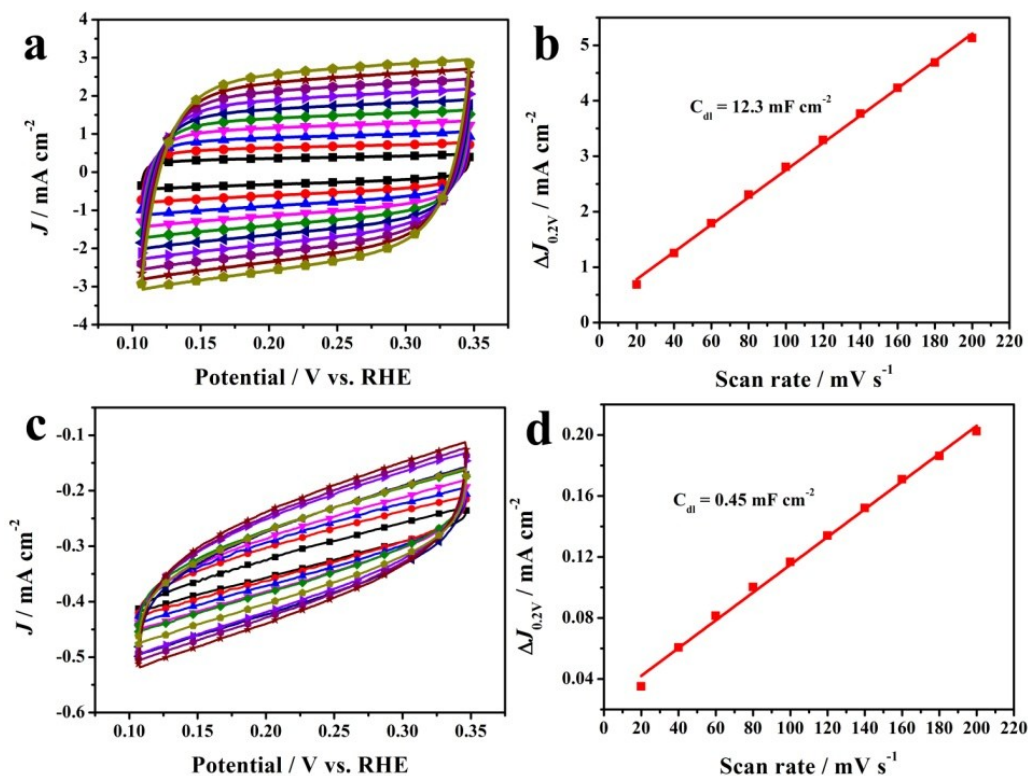

**Figure S9** The cyclic voltammetry (CV) of the Mo<sub>2</sub>C nanoribbon (a) and N-G (c) with different rates from 20 to 200 mV s<sup>-1</sup> in 0.5 M H<sub>2</sub>SO<sub>4</sub>. The capacitive current at 0.2 V as a function of scan rate for Mo<sub>2</sub>C nanoribbon (b) and N-G (d).

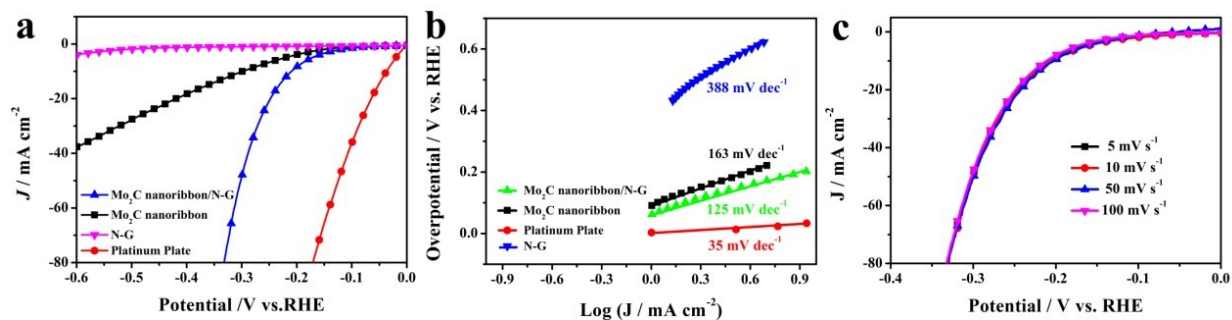

**Figure S10** (a) HER polarization curves and (b) Tafel plots of Mo<sub>2</sub>C nanoribbon/N-G, Mo<sub>2</sub>C nanoribbon, N-G and Pt plate in the 1 M KOH, respectively. (c) HER polarization curves of Mo<sub>2</sub>C nanoribbon/N-G at different scan rates.

## Reference

1. C. Tang, L. Xie, X. Sun, A. M. Asiri and Y. He, *Nanotechnology*, 2016, **27**, 20LT02.
2. W. Gao, Y. Shi, L. Zuo, W. Fan and T. Liu, *Mater. Today Chem.*, 2016, **1**, 32-39.
3. X. Wang, *RSC Advances*, 2016, **6**, 31359-31362.
4. J. Wang, H. Zhu, J. Chen, B. Zhang, M. Zhang, L. Wang and M. Du, *Int. J. Hydrogen Energ.*, 2016, **41**, 18044-18049.
5. Y. Tan, P. Liu, L. Chen, W. Cong, Y. Ito, J. Han, X. Guo, Z. Tang, T. Fujita and A. Hirata, *Adv. Mater.*, 2014, **26**, 8023-8028.
6. Q. Dong, C. Sun, Z. Dai, X. Zang and X. Dong, *ChemCatChem*, 2016, **8**, 3484-3489.
7. L. Wang, Z. Sofer, J. Luxa, D. Sedmidubský, A. Ambrosi and M. Pumera, *Electrochem. Commun.*, 2016, **63**, 39-43.
8. Y. Zhao, K. Kamiya, K. Hashimoto and S. Nakanishi, *J. Am. Chem. Soc.* 2014, **137**, 110-113.
9. K. Zhang, Y. Zhao, D. Fu and Y. Chen, *J. Mater. Chem. A*, 2015, **3**, 5783-5788.
10. P. Xiao, Y. Yan, X. Ge, Z. Liu, J.-Y. Wang and X. Wang, *Appl. Catal. B Environ.*, 2014, **154**, 232-237.
11. W.-F. Chen, C.-H. Wang, K. Sasaki, N. Marinkovic, W. Xu, J. Muckerman, Y. Zhu and R. Adzic, *Energy Environ. Sci.*, 2013, **6**, 943-951.
12. H. Vrubel and X. Hu, *Angew. Chem. Int. Ed.*, 2012, **124**, 12875-12878.
13. L. Ma, L. R. L. Ting, V. Molinari, C. Giordano and B. S. Yeo, *J. Mater. Chem. A*, 2015, **3**, 8361-8368.
14. C. Ge, P. Jiang, W. Cui, Z. Pu, Z. Xing, A. M. Asiri, A. Y. Obaid, X. Sun and J. Tian, *Electrochim. Acta*, 2014, **134**, 182-186.
15. W. Cui, N. Cheng, Q. Liu, C. Ge, A. M. Asiri and X. Sun, *ACS Catal.*, 2014, **4**, 2658-2661.
16. N. S. Alhajri, D. H. Anjum and K. Takanebe, *J. Mater. Chem. A*, 2014, **2**, 10548-10556.
